# Supplementary material for: Carbon nitride simultaneously boosted a PtRu electrocatalyst's stability and electrocatalytic activity toward concentrated methanol
Source: Royal Society of Chemistry journal article supplement (doi:10.1039/c8cc03752c), 2018-01-01
Supplement: c8cc03752c1.pdf [file c8cc03752c1.pdf]

## Supporting Information

for

### **Carbon nitride simultaneously boosted PtRu electrocatalyst's stability and electrocatalytic activity toward concentrated methanol**

Quan Zhang<sup>a</sup>, Zehui Yang<sup>a\*</sup>, Jun Yang<sup>b</sup>, Xinxin Yu<sup>a</sup>, Ying Ling<sup>a</sup>, Yunfeng Zhang<sup>a</sup>,

Weiwei Cai<sup>a\*</sup> and Hansong Cheng<sup>a</sup>

*<sup>a</sup>Sustainable Energy Laboratory, Faculty of Materials Science and Chemistry, China*

*University of Geosciences Wuhan, 388 Lumo RD, Wuhan, 430074, P. R. China*

*<sup>b</sup>Ningbo Institute of Material Technology and Engineering, Chinese Academy of*

*Science, 1219 Zhongguan West Road, Zhenhai District, Ningbo, China*

Corresponding authors: E-mail: yeungzehui@gmail.com; willcai1985@gmail.com

## Electrochemical measurement

The electrochemical measurements were performed using glassy carbon electrode (GCE) attached to CHI640e potentiostat with a conventional three-electrode configuration at 25 °C. GCE (D=5 mm) was used as the working electrode. Graphite carbon and Hg/HgCl<sub>2</sub> were used as the counter and reference electrodes, respectively. Catalyst ink was prepared as follow: the electrocatalyst (1.0 mg) was ultrasonically dispersed in isopropanol/water solution (4.0 mL) to form a homogeneous solution. The electrocatalyst ink was dropped onto the GCE to form a uniform electrocatalyst layer (Pt loading was controlled at 20 μg cm<sup>-2</sup>). Finally, the casted GCE was dried before testing. The cyclic voltammetry (CV) tests of the electrocatalysts at the scan rate of 50 mV s<sup>-1</sup> were carried out in N<sub>2</sub>-saturated 0.5 M H<sub>2</sub>SO<sub>4</sub> solution in order to evaluate the electrochemical surface area (ECSA). The PtRu durability was evaluated based on the protocol from Fuel Cell Commercialization Conference of Japan (FCCJ) (see Supporting Information, **Figure S1**). CO stripping voltammetry was performed by feeding the GCE with CO for 20 min with flow rate of 100 mL min<sup>-1</sup> and bubbled with N<sub>2</sub> for another 20 min. CO stripping was tested with scan rate of 50 mV s<sup>-1</sup>. Methanol oxidation reaction (MOR) was estimated before and after the durability tests in N<sub>2</sub>-saturated 0.5 M H<sub>2</sub>SO<sub>4</sub> with various methanol concentrations at the scan rate of 50 mV s<sup>-1</sup> at room temperature. The cell performance of the prepared MEAs was estimated from 80 °C using Scribner Model 850e fuel cell testing system. The I-V and power density curves were recorded at atmospheric pressure by flowing 1M methanol (flow rate=3 mL min<sup>-1</sup>) and 100% humidified air (flow rate= 100 mL min<sup>-1</sup>) to the anode and

cathode, respectively. Durability was estimated at 0.1 A cm<sup>-2</sup> for 2 h.

**Table S1** Ru valences of commercial PtRu/CB and PtRu/CB@C<sub>3</sub>N<sub>4</sub> calculated from Ru 3p peaks.

| Electrocatalyst                       | Ru(0) (%) | Ru(IV) (%) | Ru(II) (%) |
|---------------------------------------|-----------|------------|------------|
| PtRu/CB                               | 75        | 13.5       | 11.5       |
| PtRu/CB@C <sub>3</sub> N <sub>4</sub> | 48.3      | 37.5       | 14.2       |

**Table S2** Power densities of PtRu/CB and PtRu/CB@C<sub>3</sub>N<sub>4</sub> measured with various methanol concentrations.

|                                       | 1M                     | 2M                     | 4M                     | 8M                     |
|---------------------------------------|------------------------|------------------------|------------------------|------------------------|
|                                       | (mW cm <sup>-2</sup> ) |
| PtRu/CB                               | 48                     | 48                     | 37                     | 20                     |
| PtRu/CB@C <sub>3</sub> N <sub>4</sub> | 64                     | 66                     | 63                     | 52                     |

**Table S3** Comparison of power densities measured with 1M methanol of recently published electrocatalysts.

|                                                            | Tem. (°C) | PtRu (mg cm <sup>-2</sup> ) | PD (mW cm <sup>-2</sup> ) | Ref.      |
|------------------------------------------------------------|-----------|-----------------------------|---------------------------|-----------|
| PtRu/CB@C <sub>3</sub> N <sub>4</sub>                      | 80        | 2.0                         | 64                        | This work |
| N-GA/PtRu                                                  | 90        | 2.5                         | 93                        | 1         |
| PtRu/TiN                                                   | 80        | 2.0                         | 32.6                      | 2         |
| PtRu/C/Nafion                                              | 25        | 1.0                         | 35.4                      | 3         |
| PtRu/CECNF                                                 | 80        | 1.9                         | 71                        | 4         |
| Pt/Ce <sub>0.6</sub> Mo <sub>0.4</sub> O <sub>2-δ</sub> -C | 60        | 2.0                         | 69.4                      | 5         |
| PtSnO <sub>2</sub> /C                                      | 100       | 1.0                         | 47                        | 6         |

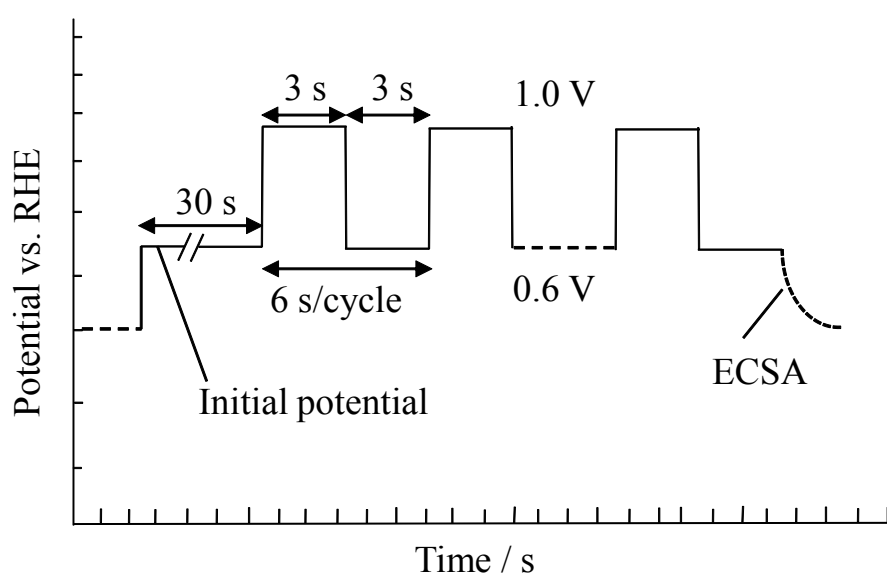

**Figure S1** New test protocol of the Pt stability test in half-cell proposed by the Fuel Cell Commercialization Conference of Japan (FCCJ).

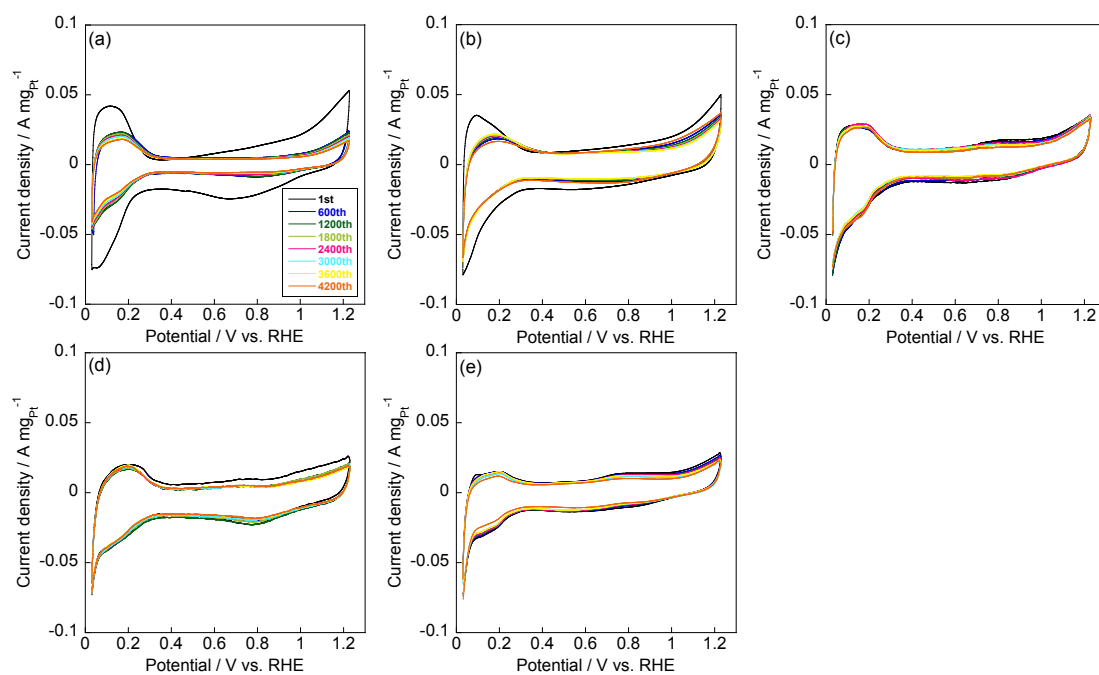

**Figure S2** Recorded durability results of commercially available PtRu/CB, PtRu/CB@C<sub>3</sub>N<sub>4</sub> (2:1), PtRu/CB@C<sub>3</sub>N<sub>4</sub> (1:1), PtRu/CB@C<sub>3</sub>N<sub>4</sub> (1:2) and PtRu/CB@C<sub>3</sub>N<sub>4</sub> (1:3).

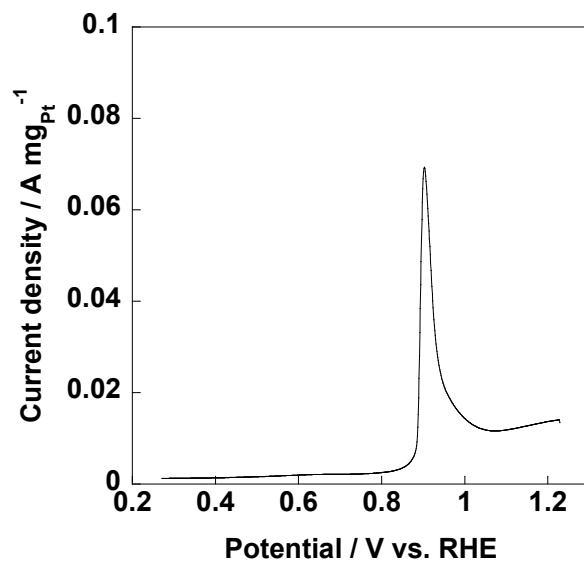

**Figure S3** CO stripping curve of commercial Pt/CB measured in N<sub>2</sub>-saturated 0.5 M H<sub>2</sub>SO<sub>4</sub> electrolyte.

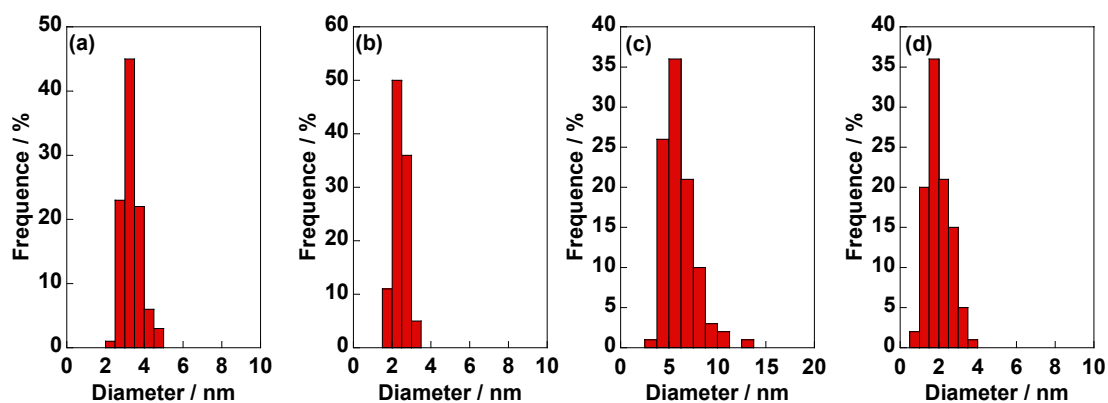

**Figure S4** Histograms of PtRu size distribution of commercial PtRu/CB (a, c) and PtRu/CB@C<sub>3</sub>N<sub>4</sub> (b, d) before and after durability test.

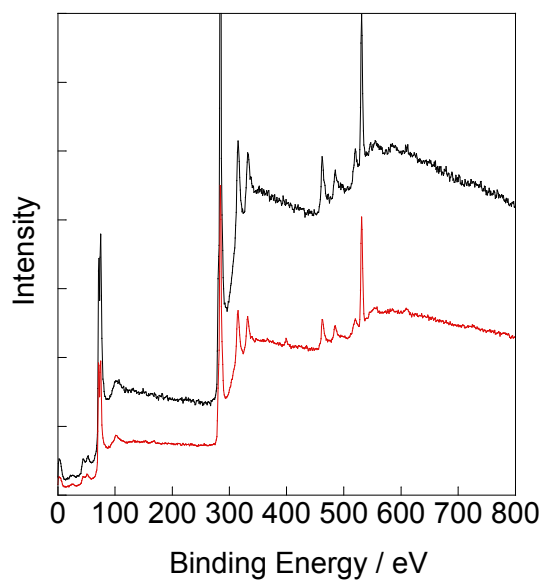

**Figure S5** XPS spectra of commercially available PtRu/CB (black line), PtRu/CB@C<sub>3</sub>N<sub>4</sub> (red line), respectively.

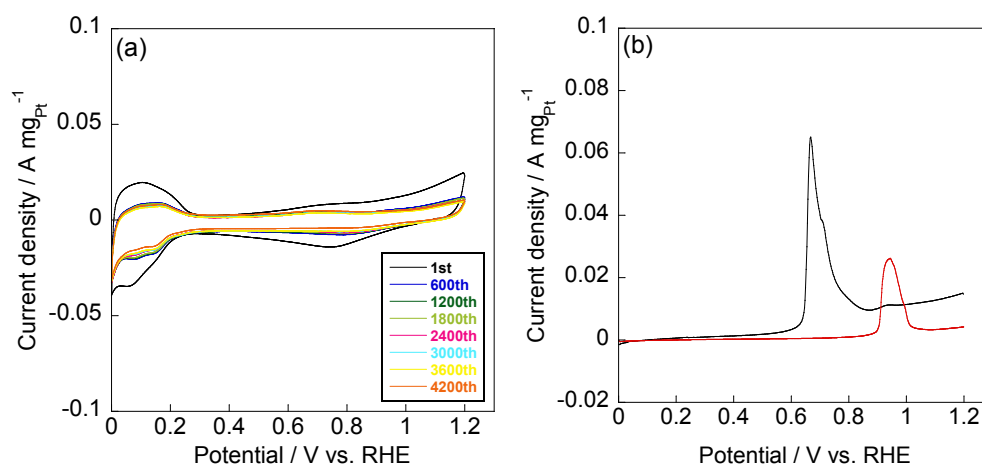

**Figure S6** CV curves of PtRu/CB-H recorded after various potential cycles. (b) CO stripping voltammetry curves of PtRu/CB-H before (black line) and after (red line) stability evaluation.

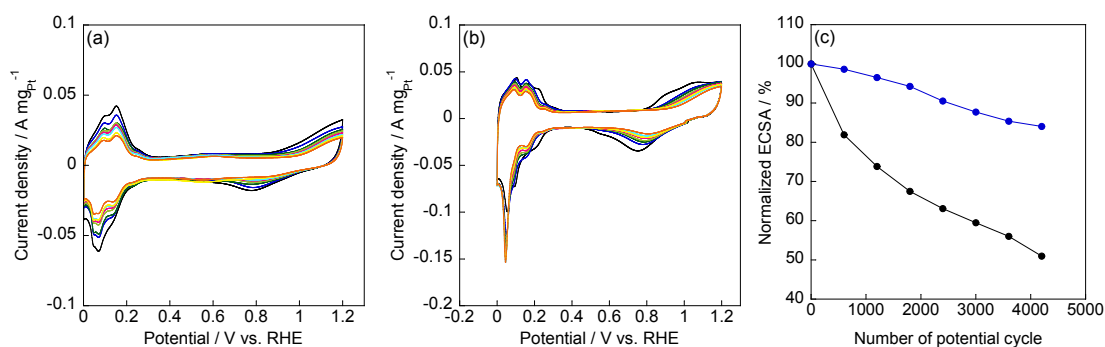

**Figure S7** CV curves of commercial Pt/CB (a) and Pt/CB@C<sub>3</sub>N<sub>4</sub> (b) recorded after various potential cycles. (c) Normalized ECSA values of commercial Pt/CB (black line) and Pt/CB@C<sub>3</sub>N<sub>4</sub> (blue line) as a function of potential cycles.

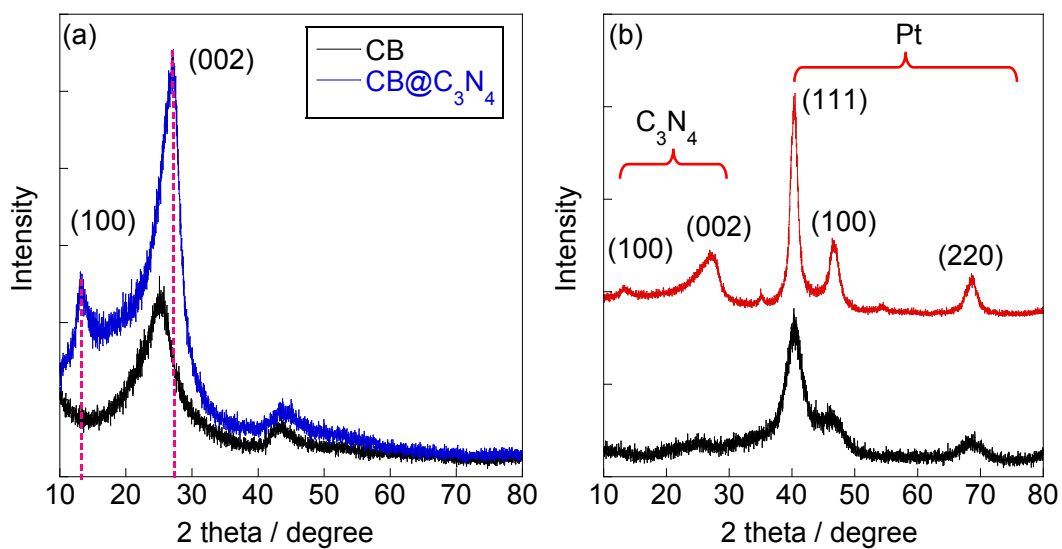

**Figure S8** XRD patterns of CB, CB@C<sub>3</sub>N<sub>4</sub> (a), PtRu/CB and PtRu/CB@C<sub>3</sub>N<sub>4</sub> (b).

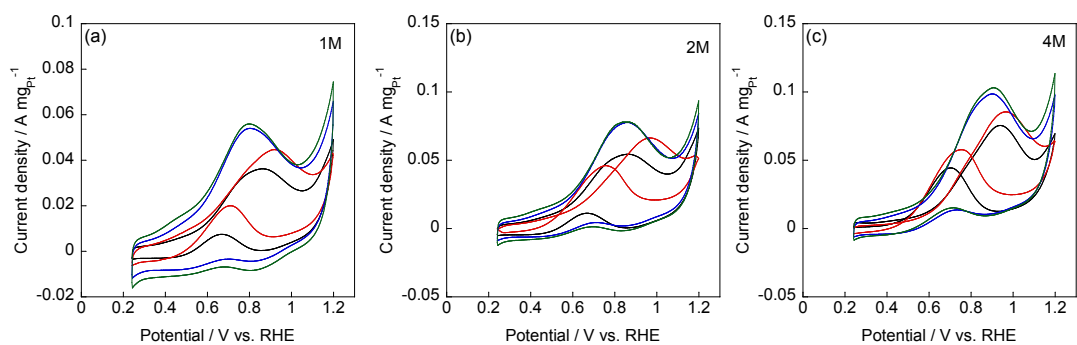

**Figure S9** Methanol oxidation reaction curves of commercial PtRu/CB (black line), PtRu/CB@C<sub>3</sub>N<sub>4</sub> (2:1, red line), PtRu/CB@C<sub>3</sub>N<sub>4</sub> (1:2, blue line) and PtRu/CB@C<sub>3</sub>N<sub>4</sub> (1:3, green line) measured with 1M, 2M and 4M methanol in 0.5M H<sub>2</sub>SO<sub>4</sub> electrolyte.

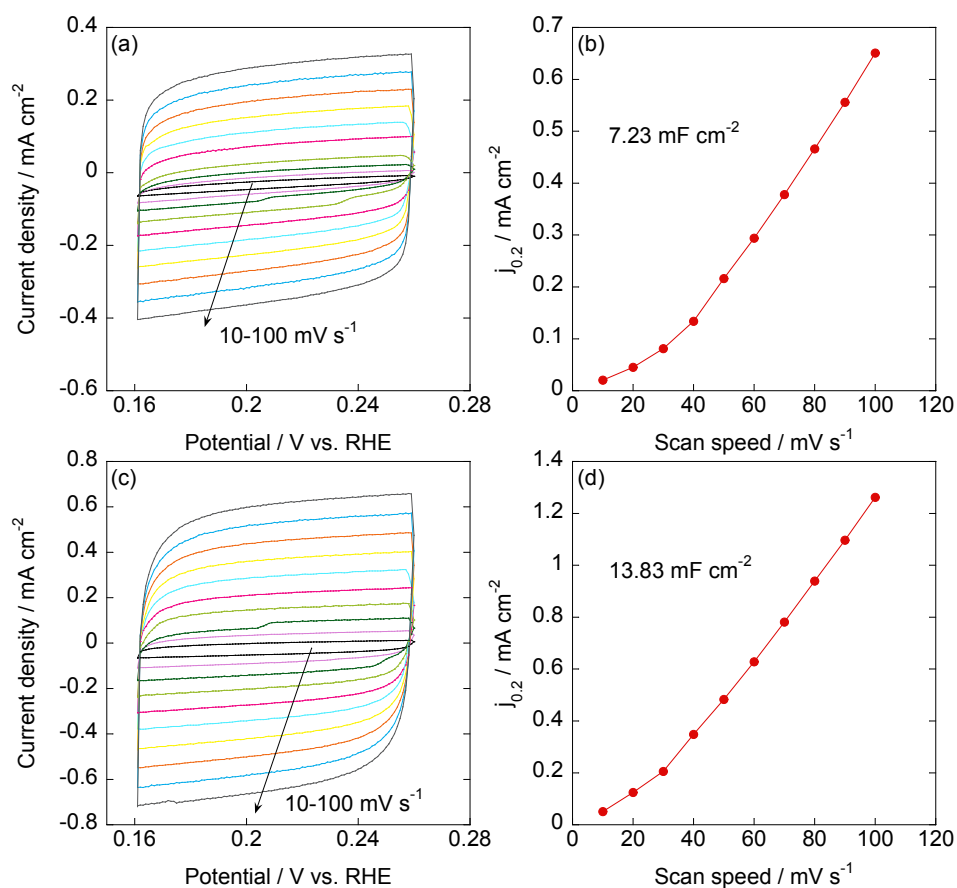

**Figure S10** CV curves of CB (a) and CB@C<sub>3</sub>N<sub>4</sub> (c) with various scan speed. Capacitive current@0.2V versus RHE as a function of scan rate for CB (b) and CB@C<sub>3</sub>N<sub>4</sub> (d).

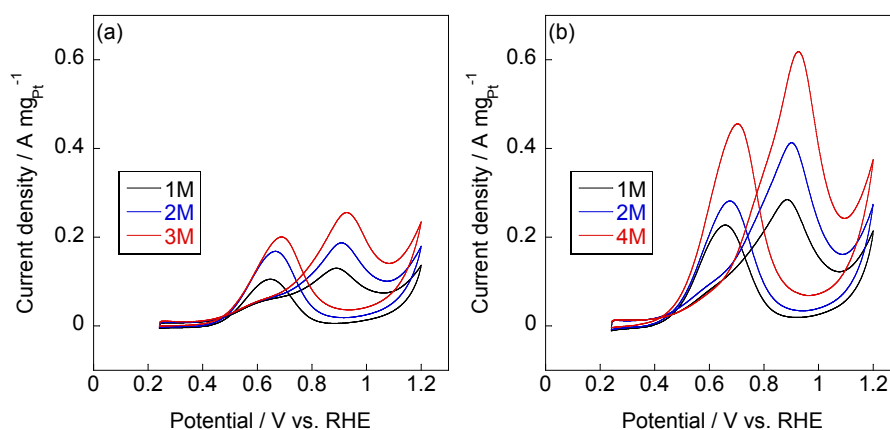

**Figure S11** Methanol oxidation reaction curves of commercial Pt/CB (a) and Pt/CB@C<sub>3</sub>N<sub>4</sub> (b) measured with 1M, 2M and 4M methanol in 0.5M H<sub>2</sub>SO<sub>4</sub> electrolyte.

## References

1. S. Zhao, H. Yin, L. Du, G. Yin, Z. Tang and S. Liu, *J. Mater. Chem. A*, 2014, **2**,

3719-3724.

2. P. P. Patel, M. K. Datta, P. H. Jampani, D. Hong, J. A. Poston, A. Manivannan and P. N. Kumta, *J. Power Sources*, 2015, **293**, 437-446.
3. Q. Cheng, Y. Wang, J. Jiang, Z. Zou, Y. Zhou, J. Fang and H. Yang, *J. Mater. Chem. A*, 2015, **3**, 15177-15183.
4. H. Kunitomo, H. Ishitobi and N. Nakagawa, *J. Power Sources*, 2015, **297**, 400-407.
5. G. Zhang, Z. Yang, W. Zhang and Y. Wang, *J. Mater. Chem. A*, 2017, **5**, 1481-1487.
6. R. M. Antoniassi, J. C. M. Silva, A. Oliveira Neto and E. V. Spinacé, *Appl. Catal. B*, 2017, **218**, 91-100.
